# Supplementary material
Source: Royal Society of Chemistry journal article supplement (doi:10.1039/d6ay00731g)
Supplement: d6ay00731g1.pdf [file d6ay00731g1.pdf]

## Supporting Information

Development of bioluminescent enzyme immunoassay for glycocholic acid based on  
single-chain variable fragment-nanoluciferase fusion protein

Yunping Mu<sup>a</sup>, Huajian Cai<sup>a</sup>, Xindan Zhang<sup>b</sup>, Mingxia Lin<sup>a</sup>, Junhao Zeng<sup>a</sup>, Yiyun  
Wang<sup>a</sup>, Ziming Wu<sup>a</sup>, Suqing Zhao<sup>a</sup>, Xiping Cui<sup>a, \*</sup>

<sup>a</sup> *Department of Biomedical Engineering, School of Biomedical and Pharmaceutical  
Sciences, Guangdong University of Technology, Guangzhou 510006, People's  
Republic of China*

<sup>b</sup> *Guangzhou Quality Testing & Inspection Institute, Guangzhou 511447, People's  
Republic of China*

\*Corresponding Author:

Dr. Xiping Cui

E-mail address: xipcui@gdut.edu.cn

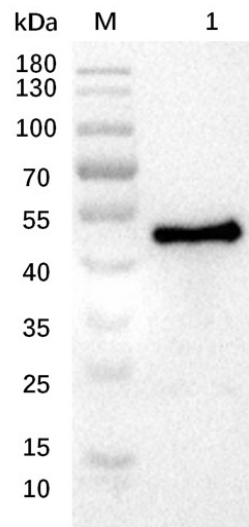

Figure S1 Analysis of scFv-Nluc fusion protein

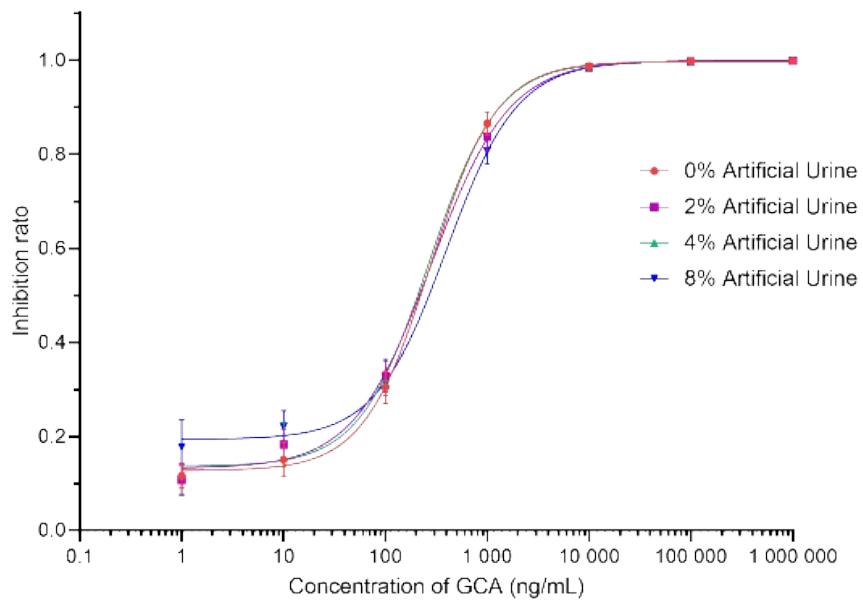

Figure S2 BLEIA competition curves of GCA prepared at various artificial urine concentrations

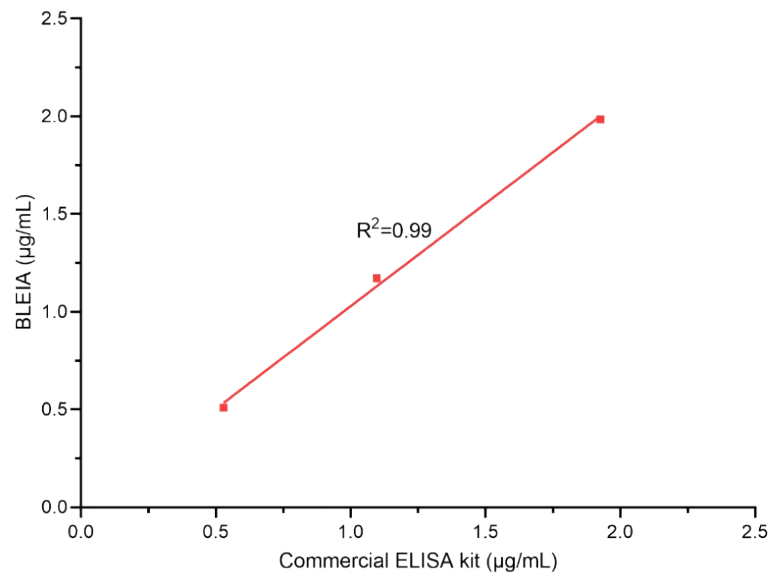

Figure S3 Correlation between BLEIA and Commercial ELISA kit results for the artificial urine sample

Table S1 Primer sequence information

| Name | Sequence (5'-3')                           |
|------|--------------------------------------------|
| SNF1 | CC <u>G</u> AATTCGGTGGCCCAGGCGGCCCTGACTCAG |
| SNR1 | ACCGCCGCTGCCGCCACCACCCTGGCCGGCCTGG         |
| SNF2 | GGTGGTGGCAGCGGCGGTATGGTCTTCACACTCGAA       |
| SNR2 | CCGCTC <u>G</u> AGCGCCAGAATGCGTTCGCA       |

Underline indicates *EcoR* I and *Xho* I restriction enzyme sites
